# Supplementary material
Source: PubMed Central journal article supplement (PMC3675876)
Supplement: NIHMS469980-supplement-Supp_Fig_1.pdf [file NIHMS469980-supplement-Supp_Fig_1.pdf]

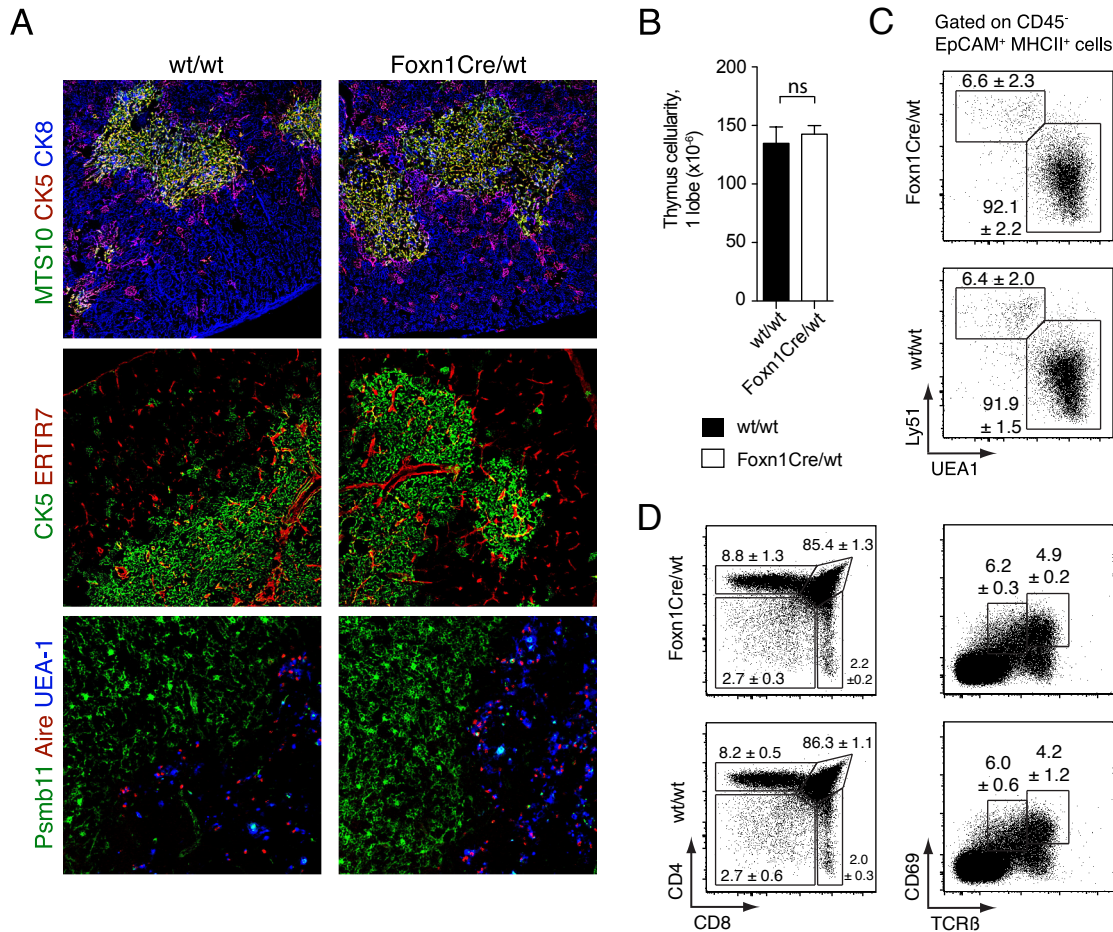

**Supplemental Figure 1. Heterozygous Foxn1-Cre mice display a regular thymus size, cellular architecture and function.** (A) Immunofluorescence analysis of thymic tissue sections from heterozygous Foxn1Cre transgenic (Foxn1Cre/wt) and wild type (wt/wt) mice using antibodies specific for ERTR7 to identify fibroblasts; for CK8 and Psmb11 to detect cTEC; and for MTS10, CK5, and Aire as well as reactivity with UEA-1 to recognize mTEC. Data are representative of two separate experiments with at least three mice each. (B) Total thymic cell numbers of wt/wt (black bars) and Foxn1-Cre/wt (white bars) mice at 3 weeks of age; ns: not significant. (C) Flow cytometric analysis of TEC (CD45-EpCAM<sup>+</sup>MHCII<sup>+</sup>) subpopulations isolated from thymic tissue of Foxn1Cre/wt and wt/wt mice. The relative frequency (right panels) and absolute cell numbers (left graph) of cTEC (UEA-1-Ly51<sup>+</sup>) and mTEC (UEA-1-Ly51<sup>-</sup>) from wt/wt (black bars) and Foxn1Cre/wt mice (white bars) are shown. Data indicate the mean  $\pm$  SD of at least 3 mice per group; \*denotes  $p < 0.05$ ; \*\*  $p < 0.01$ ; \*\*\*  $p < 0.001$ . Data are representative of three independent experiments. (D) Flow cytometric analysis of thymocyte development using surface markers CD4 and CD8 (left panels), and markers for positive selection, CD69 and TCR $\beta$  (right panels). The relative frequencies of the indicated populations isolated from wt/wt (lower panels) and Foxn1Cre/wt mice (upper panels) are shown. Data indicate the mean  $\pm$  SD of at least 3 mice per group; \*denotes  $p < 0.05$ ; \*\*  $p < 0.01$ . Data are representative of three independent experiments.
