# Supplementary material
Source: PubMed Central journal article supplement (PMC3675876)
Supplement: NIHMS469980-supplement-Supp_Fig_2.pdf [file NIHMS469980-supplement-Supp_Fig_2.pdf]

p2

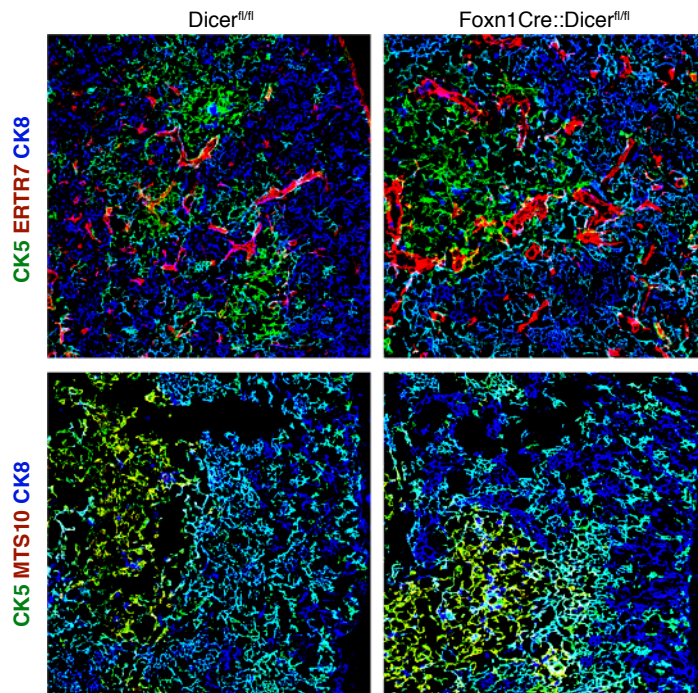

**Supplemental Figure 2. Thymic microenvironment of 2 day old (p2) Foxn1-Cre::Dicer<sup>fl/fl</sup> mice.** Immuno- fluorescence analysis of thymic tissue sections from p2 Dicer<sup>fl/fl</sup> or Foxn1-Cre::Dicer<sup>fl/fl</sup> mice. Antibodies were used to identify fibroblasts (ERTR7), cortical (CK8) and medullary (MTS10, CK5) TEC. Original magnification 20x. Data are representative of two separate experiments.
