# Supplementary material
Source: PubMed Central journal article supplement (PMC3675876)
Supplement: NIHMS469980-supplement-Supp_Fig_3.pdf [file NIHMS469980-supplement-Supp_Fig_3.pdf]

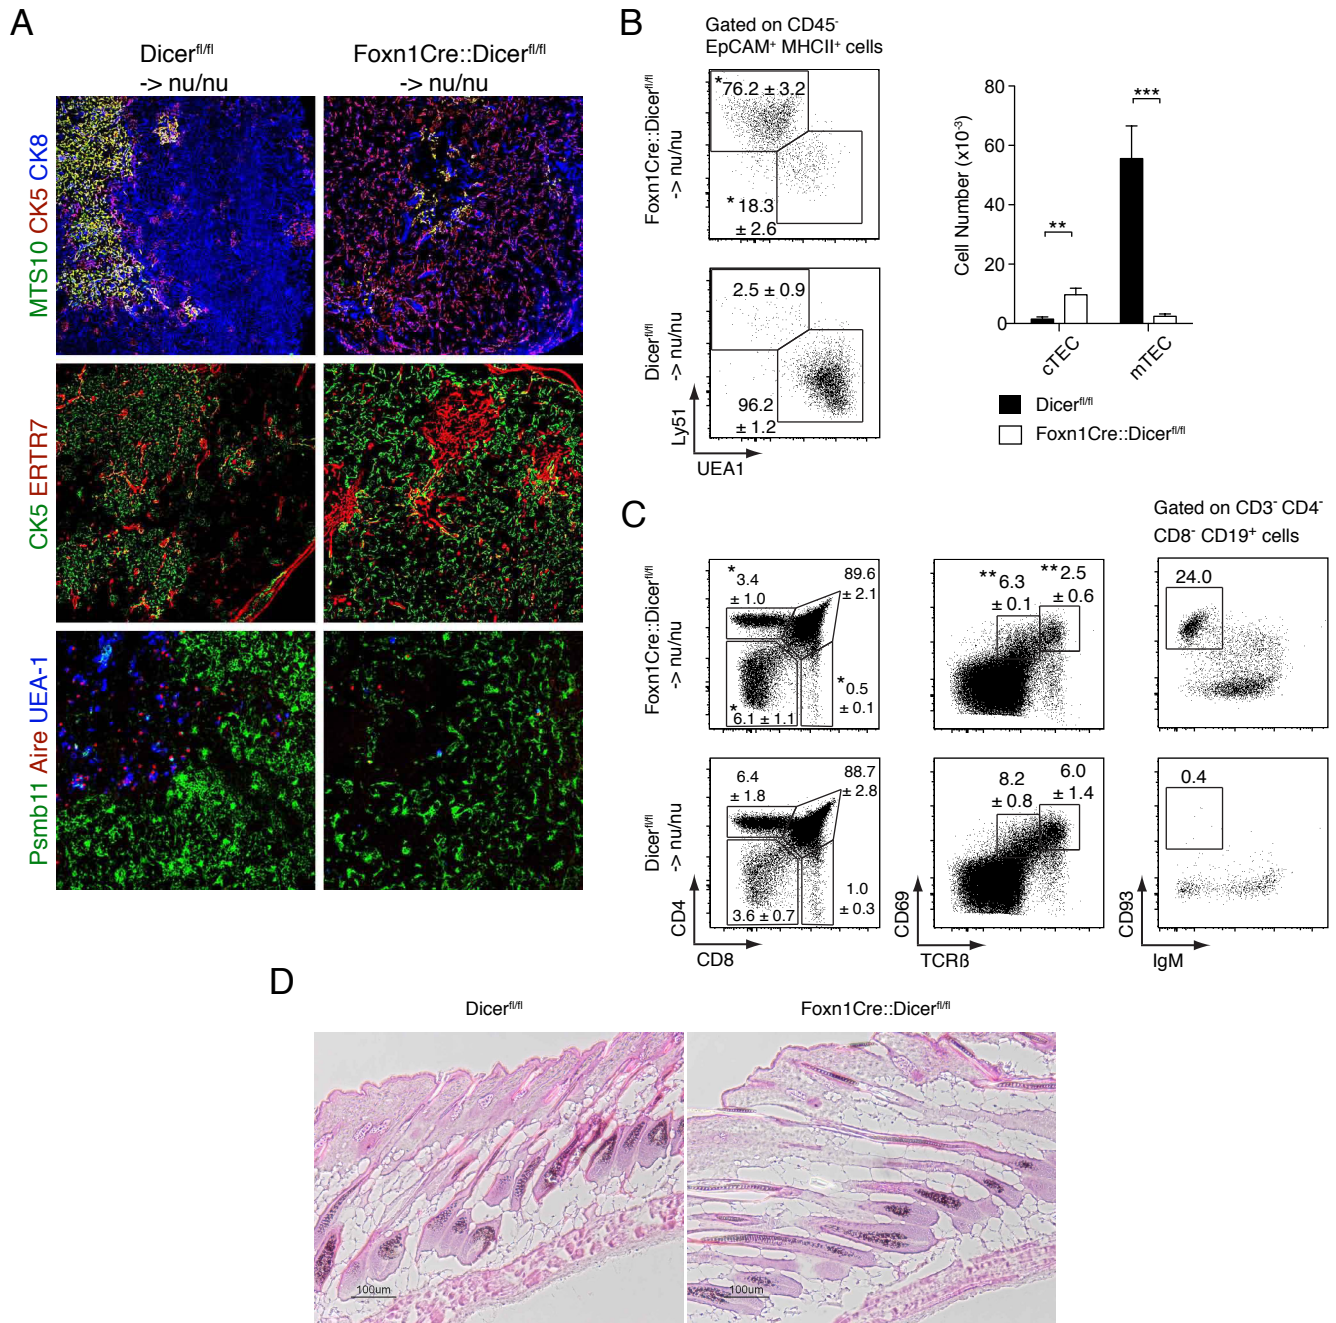

**Supplemental Figure 3. TEC phenotype of Foxn1-Cre::Dicer<sup>fl/fl</sup> mice is unaffected by Cre-mediated recombination in keratinocytes.** Fetal thymic lobes from E15.5 Dicer<sup>fl/fl</sup> or Foxn1-Cre::Dicer<sup>fl/fl</sup> embryos were transplanted under the kidney capsule of nu/nu recipients and grafts were analyzed 4 weeks later. (A) Immunofluorescence analysis of thymic tissue sections using antibodies specific for ERTR7 to identify fibroblasts; for CK8 and Psmb11 to detect cTEC; and for MTS10, CK5, and Aire as well as reactivity to UEA-1 to recognize mTEC. Data are representative of three separate experiments with at least two mice each. (B) Flow cytometric analysis of TEC (CD45-EpCAM+MHCII+) subpopulations isolated from thymic tissue grown under the kidney capsule of a nu/nu recipient mice. The relative frequency (left panels) and absolute cell numbers (right graph) of cTEC (UEA-1-Ly51+) and mTEC (UEA-1+Ly51-) from Dicer<sup>fl/fl</sup> (black bars) and Foxn1-Cre::Dicer<sup>fl/fl</sup> (white bars) of the indicated grafts are shown. Data show the mean  $\pm$  SD of at least 3 mice per group; \*denotes  $p < 0.05$ ; \*\*  $p < 0.01$ ; \*\*\*  $p < 0.001$ . Data are representative of three independent experiments. (C) Flow cytometric analysis of lymphopoiesis in the grafts using surface markers CD4 and CD8 for T lineage development (left panels), markers for thymocyte positive selection CD69 and TCR $\beta$  (middle panels) and the expression of CD93 and IgM to identify B cell maturation in situ. The relative frequencies of the respective populations for Dicer<sup>fl/fl</sup> (lower panels) and Foxn1-Cre::Dicer<sup>fl/fl</sup> grafts (upper panels) are shown. Data indicate the mean  $\pm$  SD of at least 3 mice per group; \*denotes  $p < 0.05$ ; \*\*  $p < 0.01$ . Data are representative of three independent experiments. (D) Hematoxylin and eosin (HE) staining of skin sections from 3 week old Dicer<sup>fl/fl</sup> or Foxn1-Cre::Dicer<sup>fl/fl</sup> mice.
